# Supplementary material for: Targeting heme oxygenase-1 by quercetin ameliorates alcohol-induced acute liver injury via inhibiting NLRP3 inflammasome activation
Source: Royal Society of Chemistry journal article supplement (doi:10.1039/c8fo00650d), 2018-01-01
Supplement: c8fo00650d1.pdf [file c8fo00650d1.pdf]

Supplementary table 1. Clinical parameters of healthy controls and the patients with alcoholic hepatitis

|                                      | Control group | Alcoholic hepatitis | P value |
|--------------------------------------|---------------|---------------------|---------|
| Male (n)                             | 17            | 21                  | -       |
| Female (n)                           | 3             | 4                   | -       |
| Age(years)                           | 36.9 ± 1.57   | 39.72 ± 1.61        | 0.22    |
| Body mass index (kg/m <sup>2</sup> ) | 21.37 ± 0.26  | 22.09 ± 0.28        | 0.07    |
| Alcohol intake (g/day)               | 4.75 ± 1.38   | 88 ± 7.21           | <0.0001 |
| HO-1 levels (ng/L)                   | 195.2 ± 4.02  | 157.3 ± 5.63        | <0.0001 |
| ALT(U/L)                             | 19.65 ± 1.27  | 194 ± 6.06          | <0.0001 |
| AST(U/L)                             | 17.75 ± 1.25  | 267.1 ± 10.27       | <0.0001 |
| GGT(U/L)                             | 23.25 ± 1.67  | 273 ± 13.06         | <0.0001 |
| ALP(U/L)                             | 83.55 ± 3.84  | 326 ± 16.36         | <0.0001 |
| ALB()                                | 44.48 ± 0.57  | 22.45 ± 0.63        | <0.0001 |
| TBil (umol/L)                        | 14.15 ± 0.61  | 388.5 ± 12.90       | <0.0001 |
| DBil (umol/L)                        | 4.84 ± 0.22   | 194 ± 5.72          | <0.0001 |
| PT (s)                               | 13.26 ± 0.11  | 16.56 ± 0.14        | <0.0001 |
| APTT (s)                             | 37.54 ± 0.56  | 45.92 ± 0.26        | <0.0001 |
| DF                                   |               | 34.51 ± 1.26        | -       |
